# Supplementary material for: Adaptive Responses to PARP Inhibition Predict Response to Olaparib and Durvalumab: Multi-omic Analysis of Serial Biopsies in the AMTEC Trial
Source: bioRxiv or medRxiv preprint supplement (doi:10.1101/2024.08.29.24312245), 2025-12-17

# Extended Data Figure 1

**a**

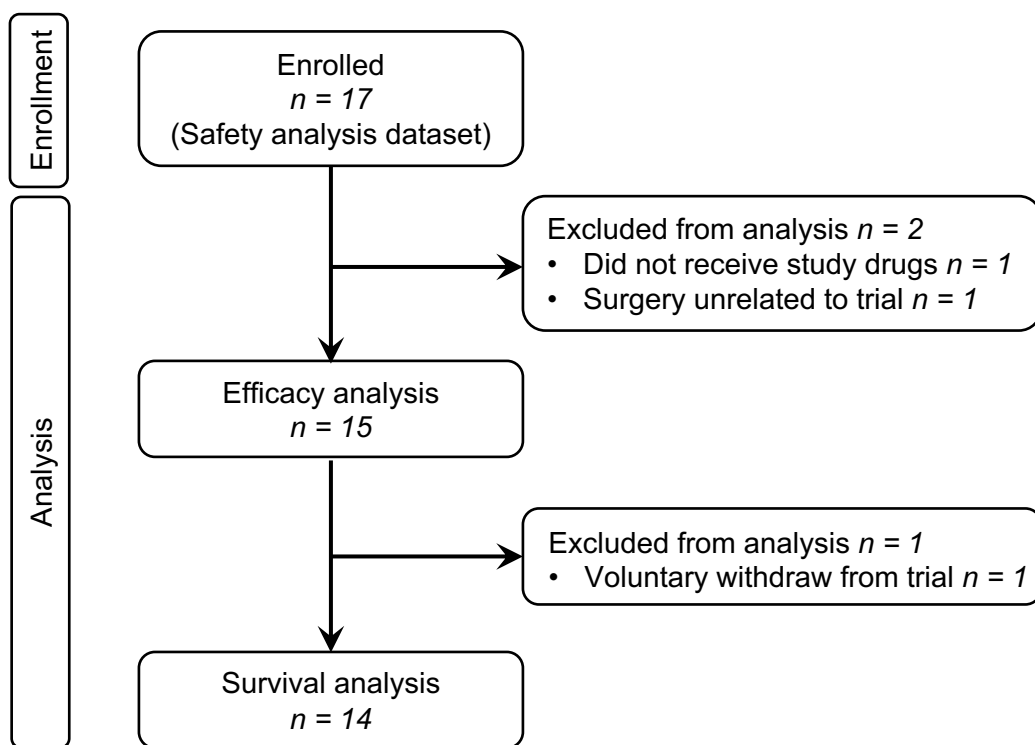

# Extended Data Figure 1

**b**

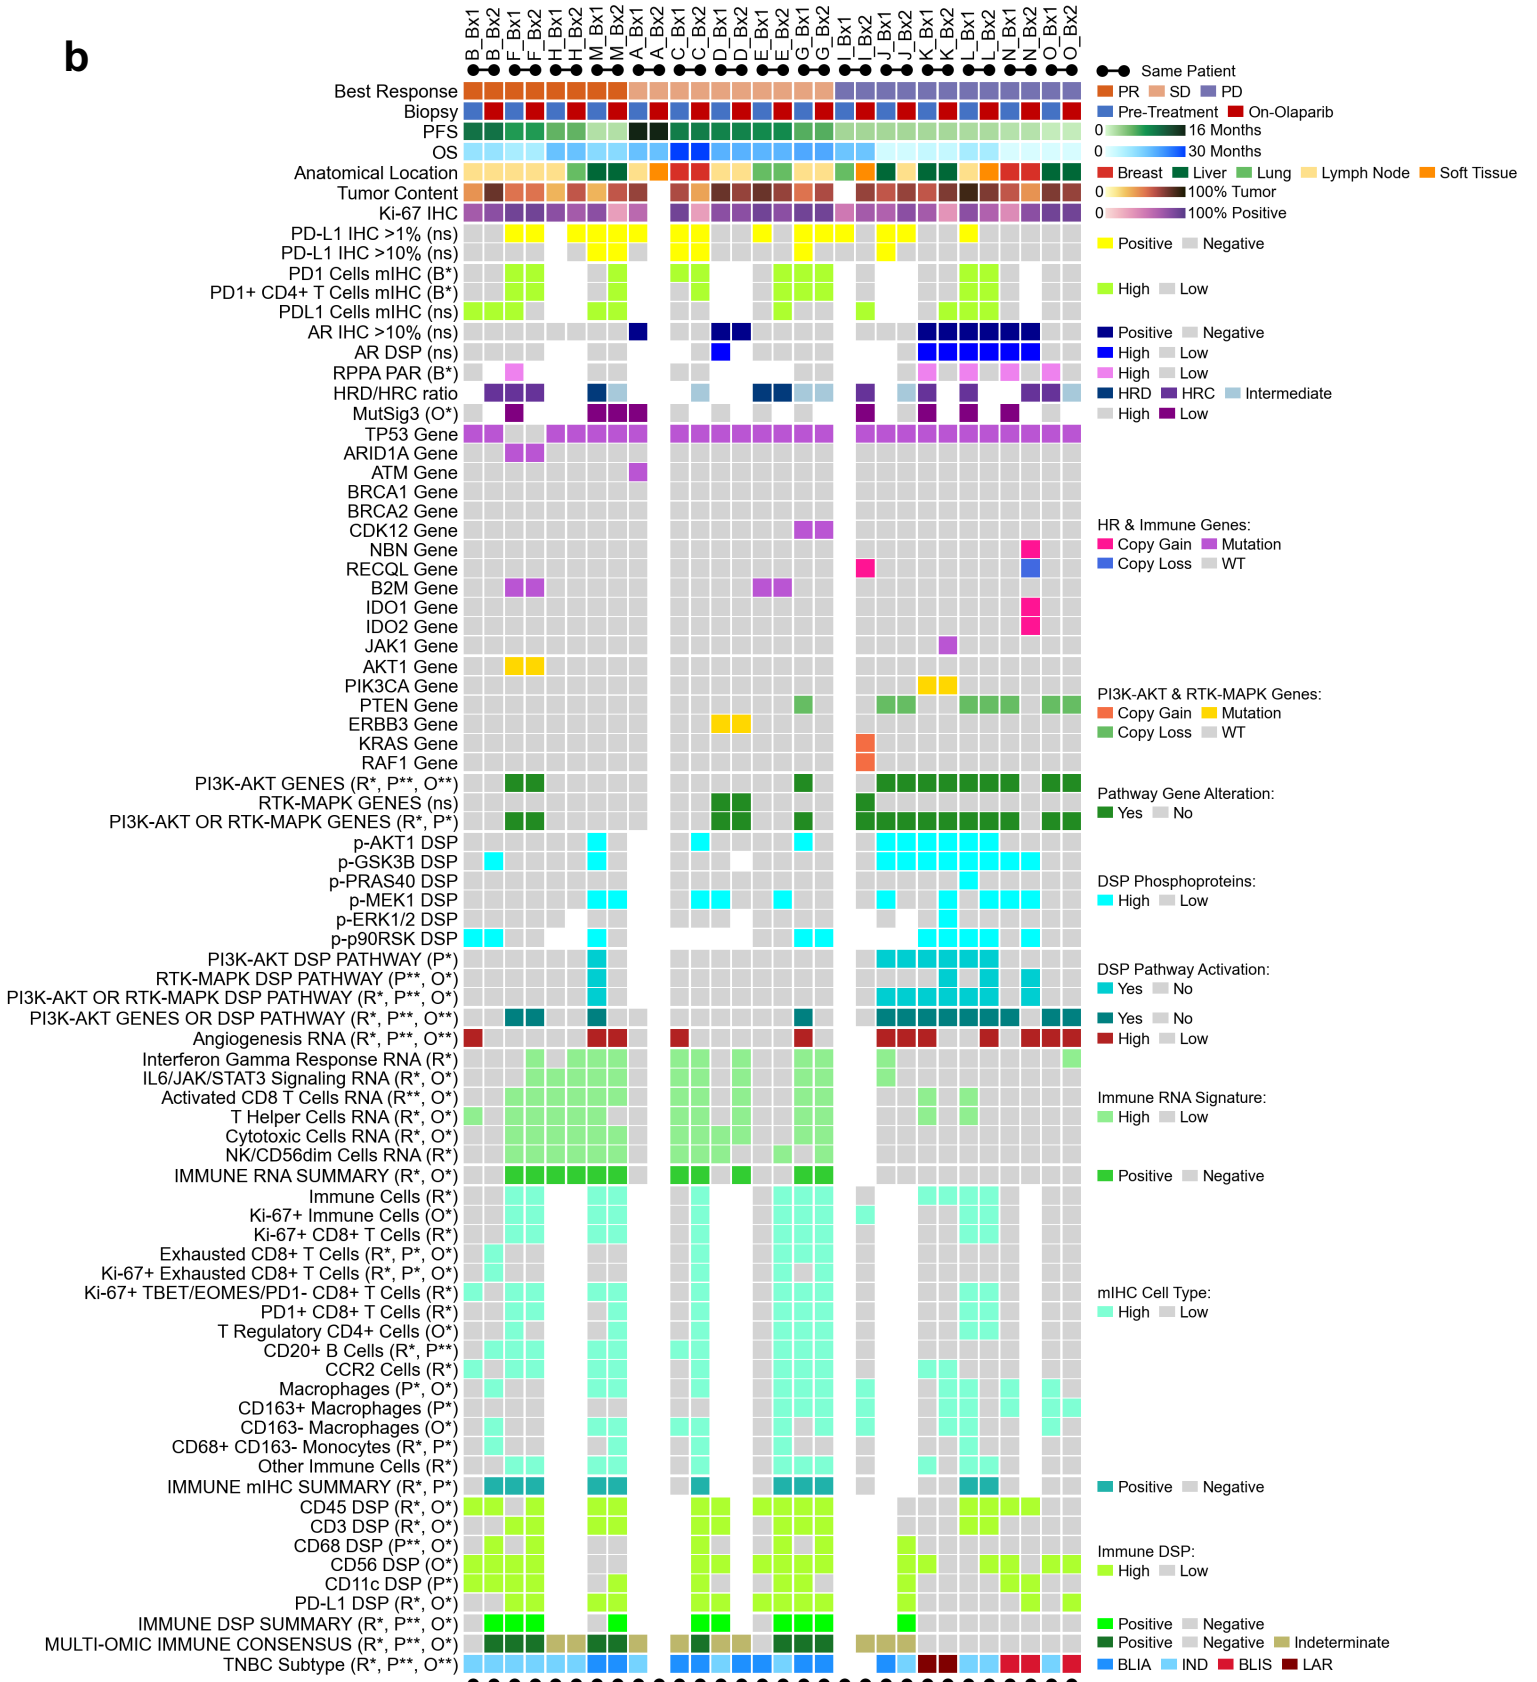

# Extended Data Figure 1

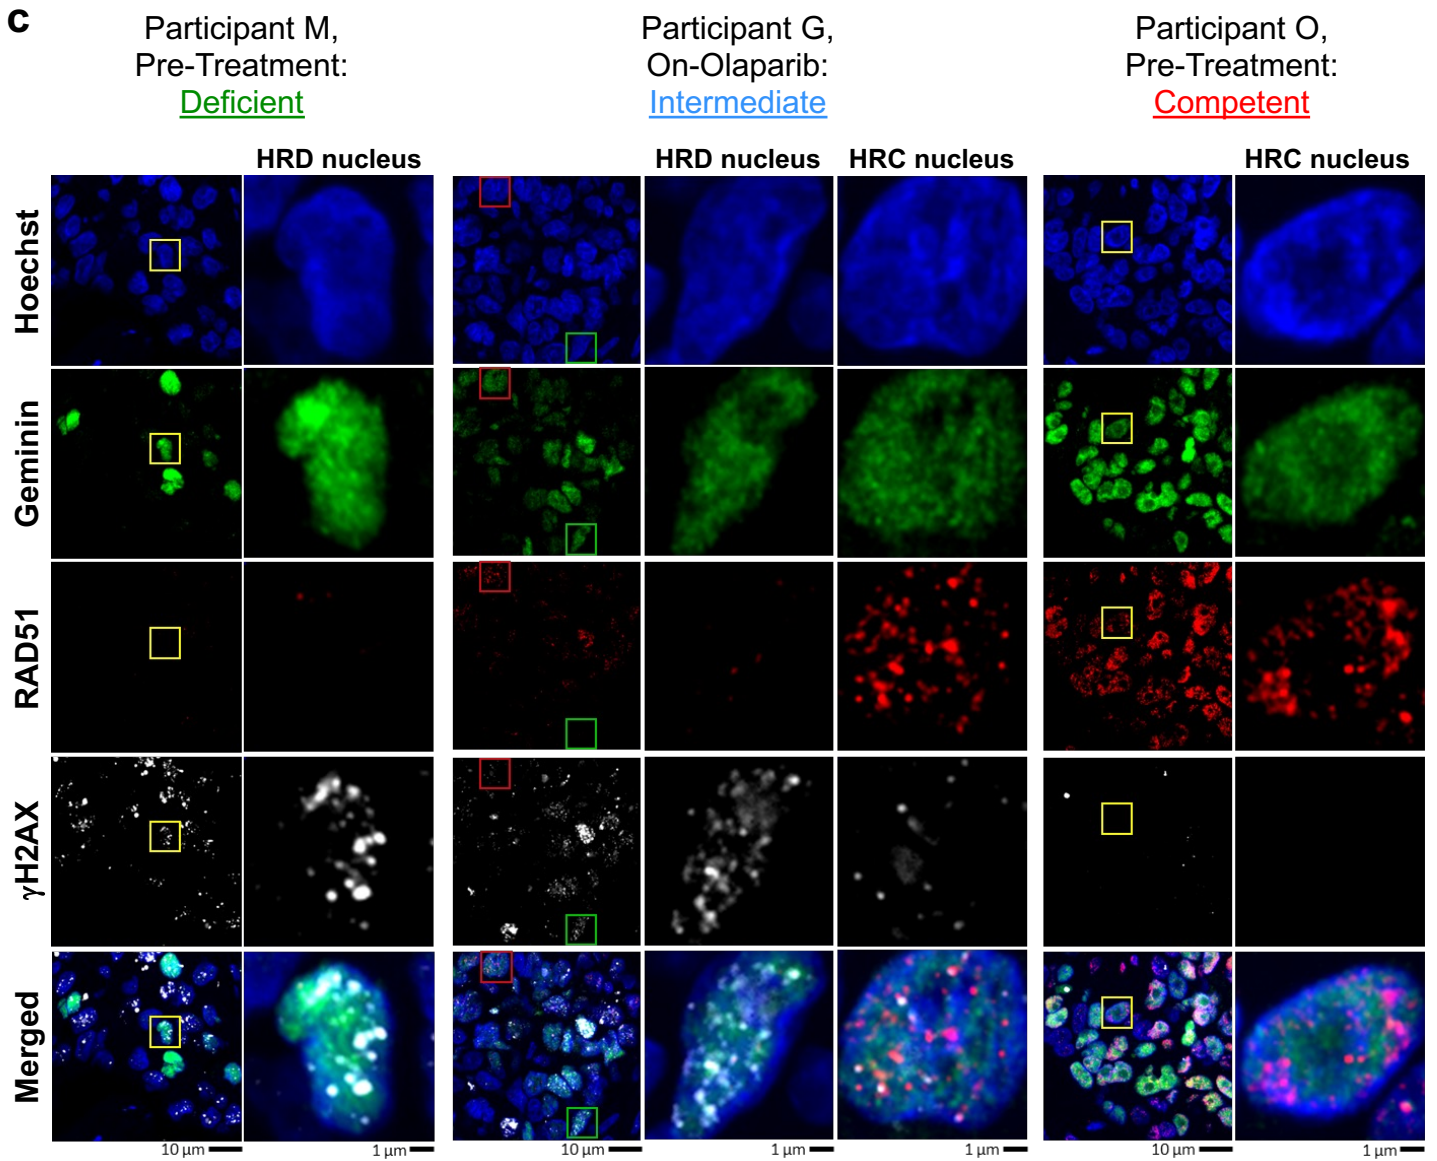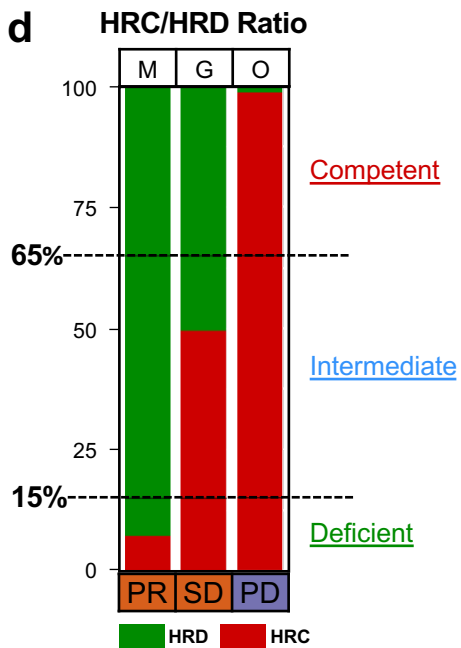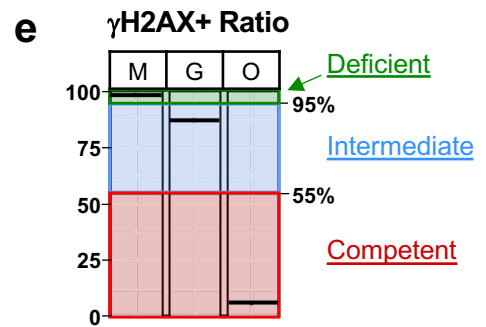

# Extended Data Figure 2

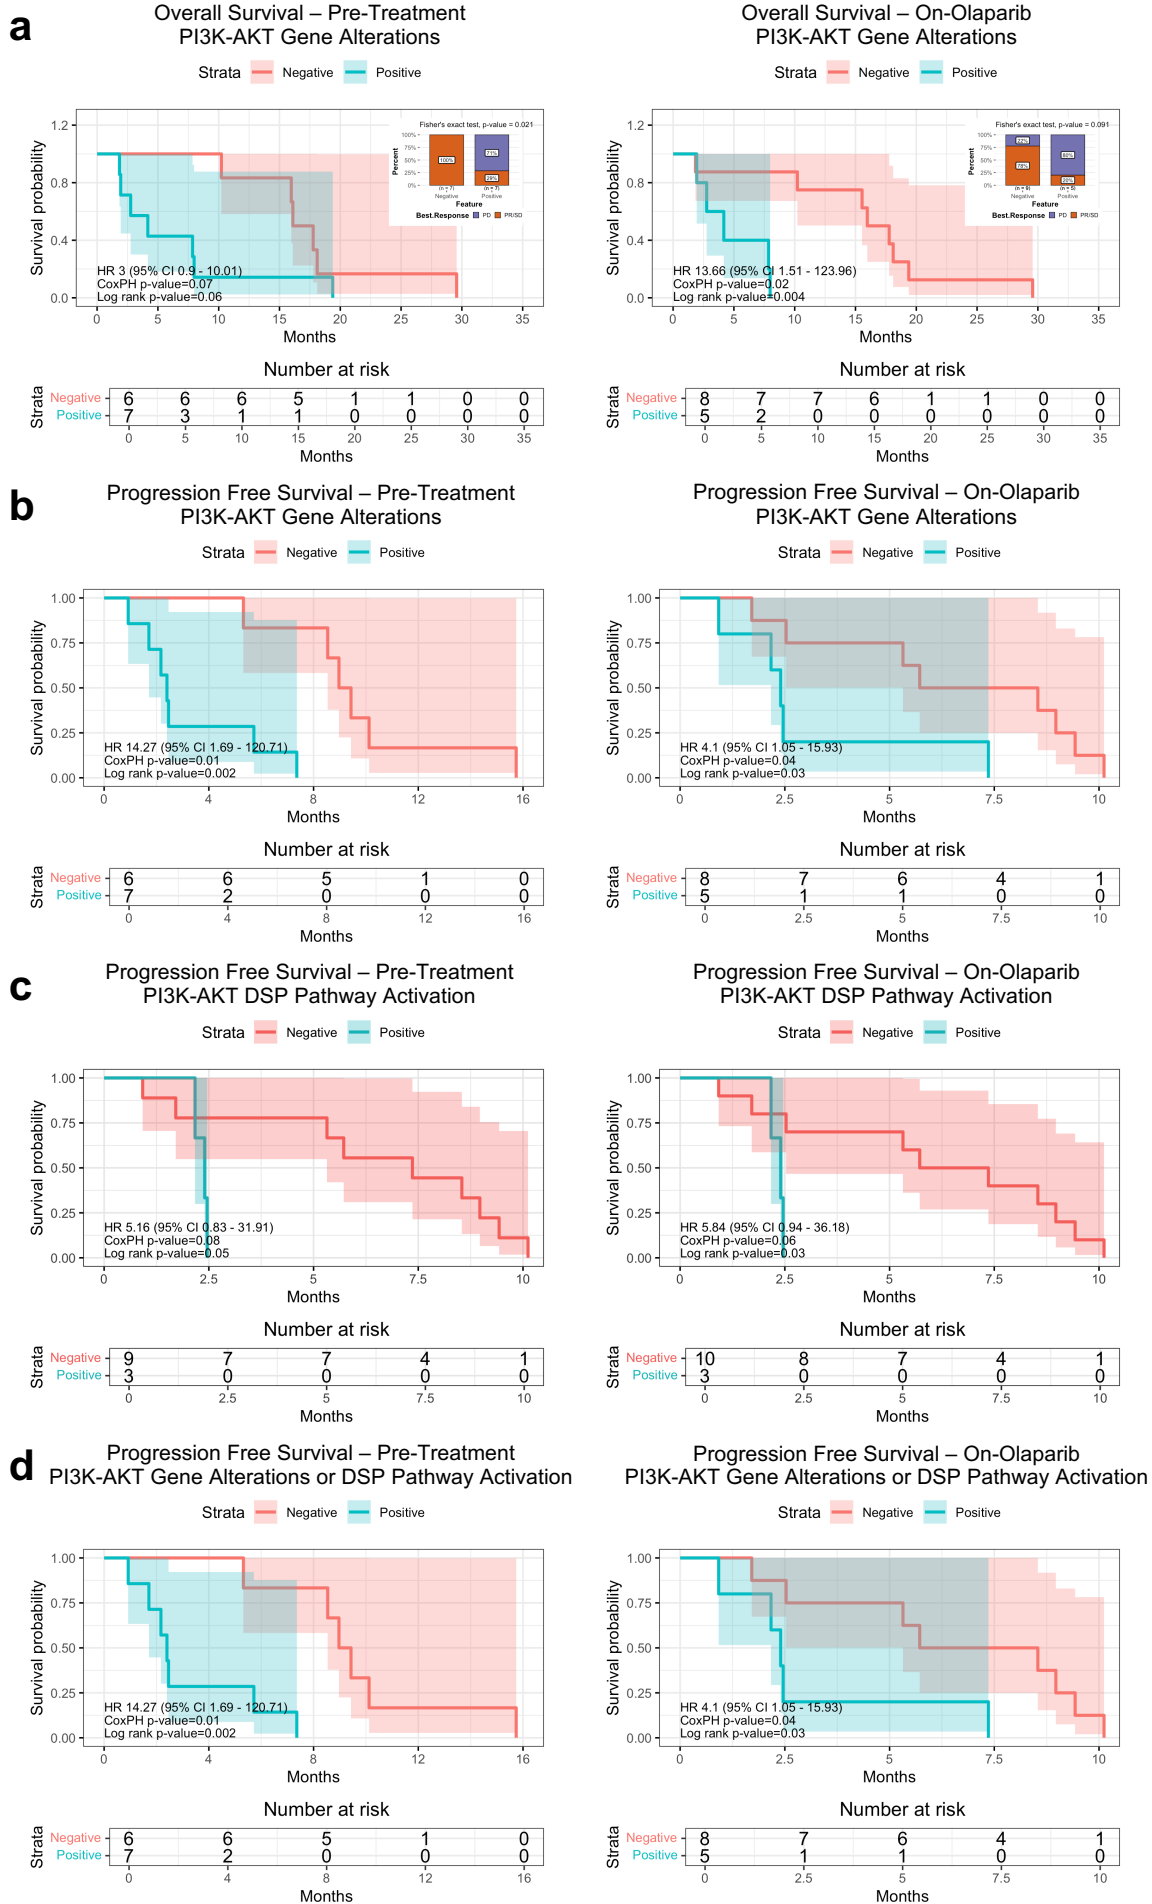

# Extended Data Figure 2

**e** Progression Free Survival – Pre-Treatment RTK-MAPK DSP Pathway Activation

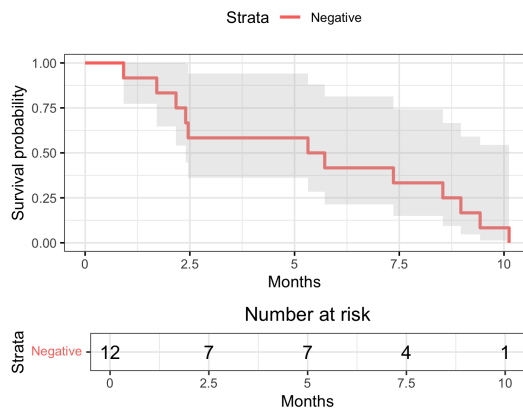

Progression Free Survival – On-Olaparib RTK-MAPK DSP Pathway Activation

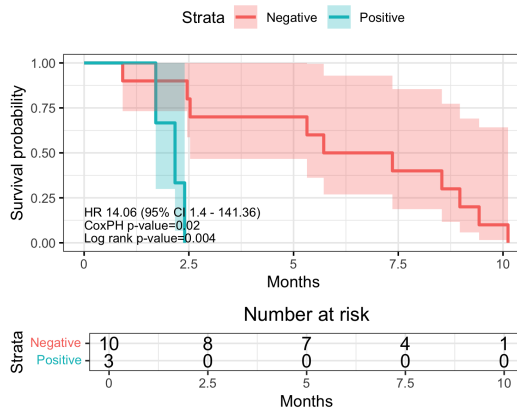

**f** Progression Free Survival – Pre-Treatment PI3K-AKT or RTK-MAPK DSP Pathway Activation

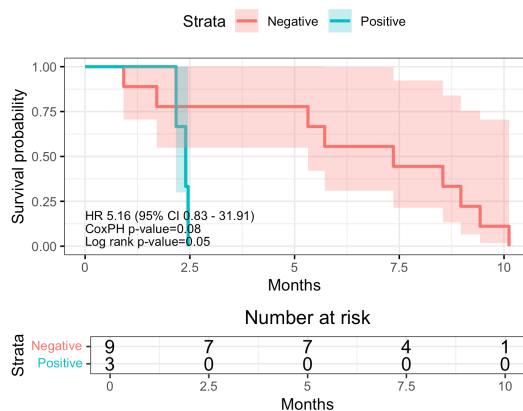

Progression Free Survival – On-Olaparib PI3K-AKT or RTK-MAPK DSP Pathway Activation

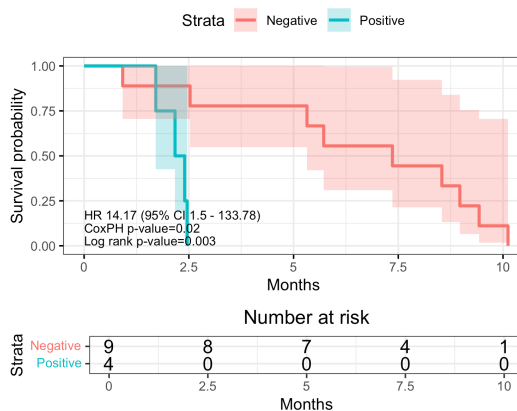

**g** Progression Free Survival – Pre-Treatment PI3K-AKT or RTK-MAPK Gene Alterations

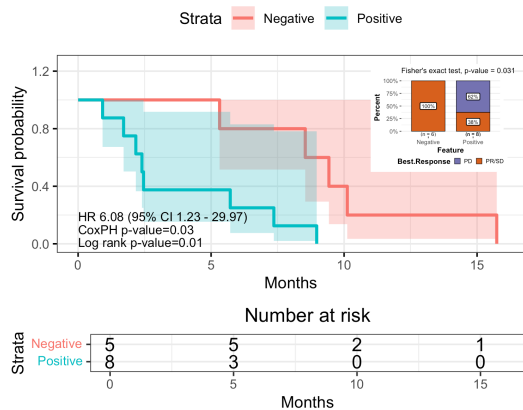

Progression Free Survival – On-Olaparib PI3K-AKT or RTK-MAPK Gene Alterations

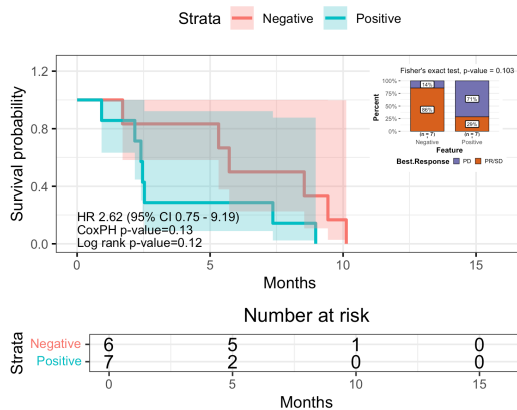

# Extended Data Figure 3

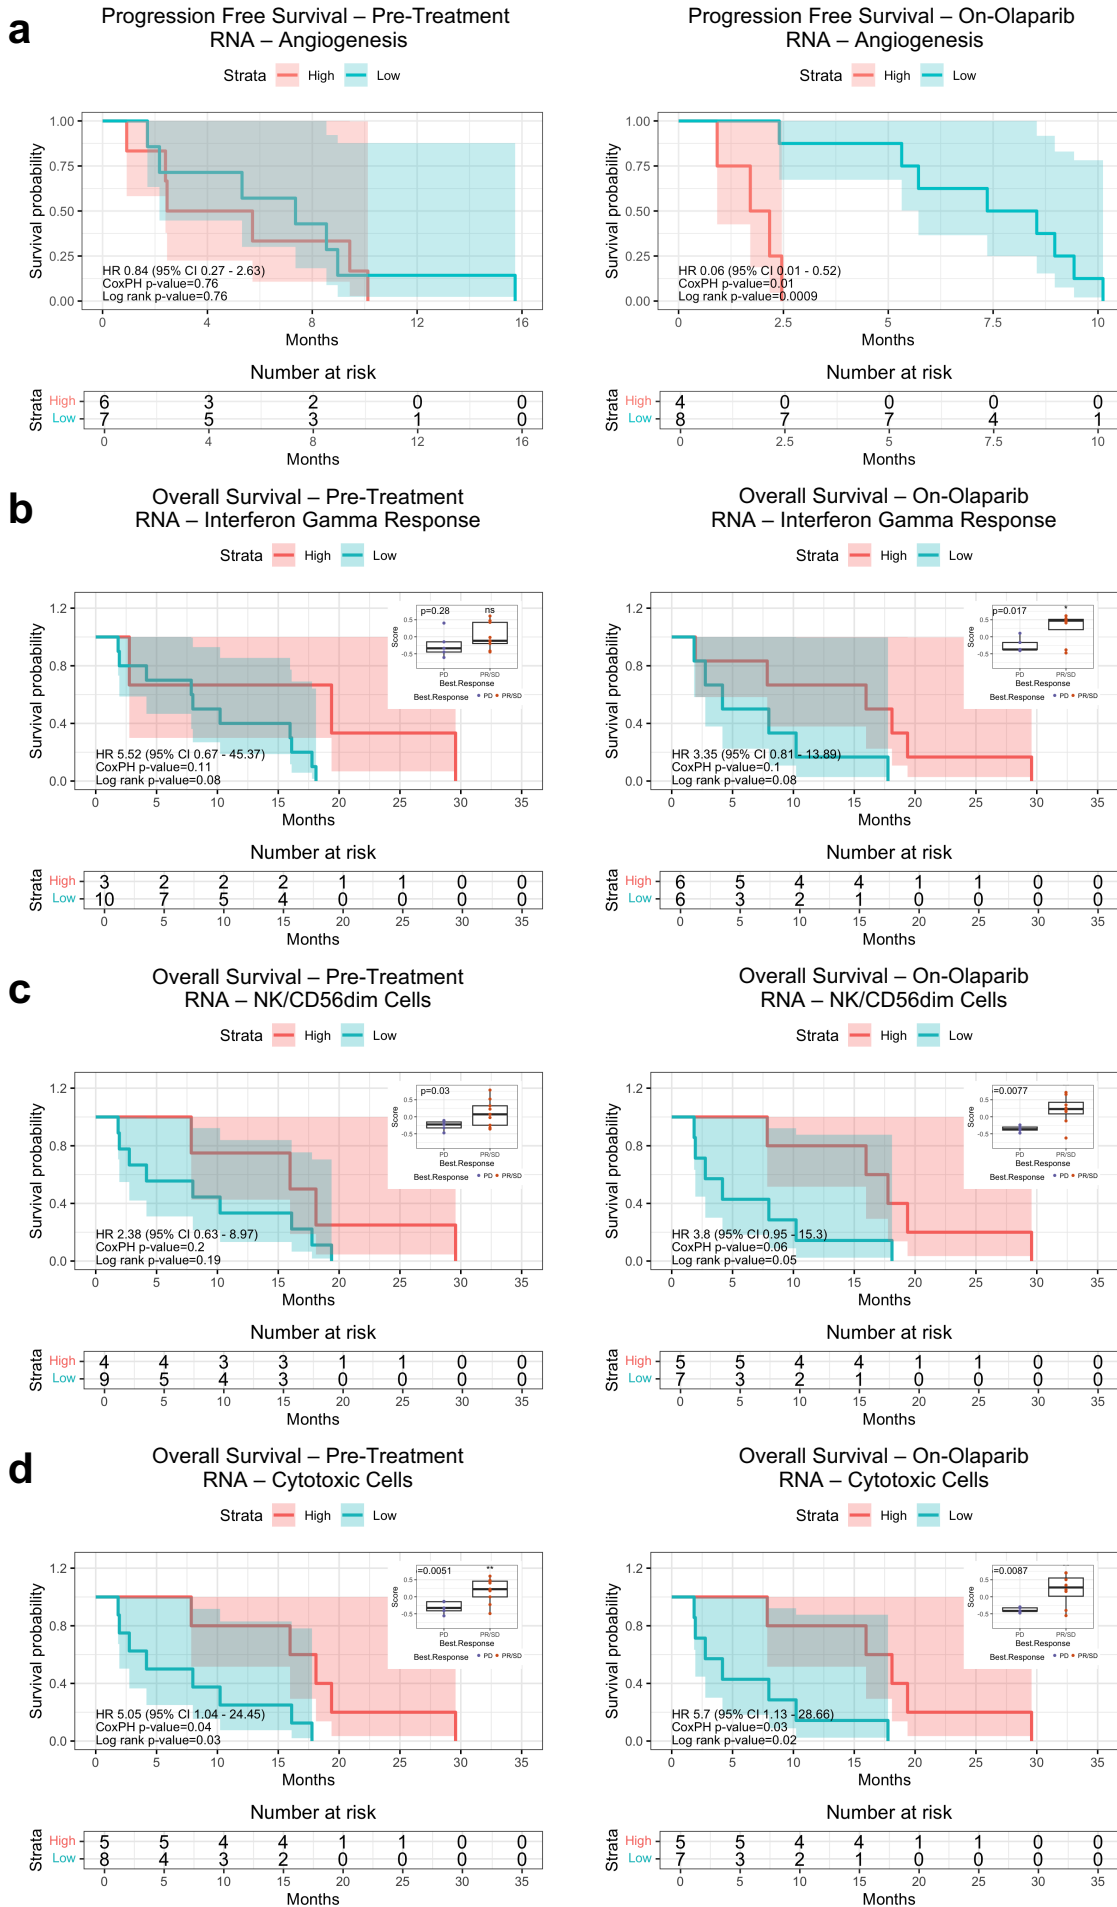

# Extended Data Figure 4

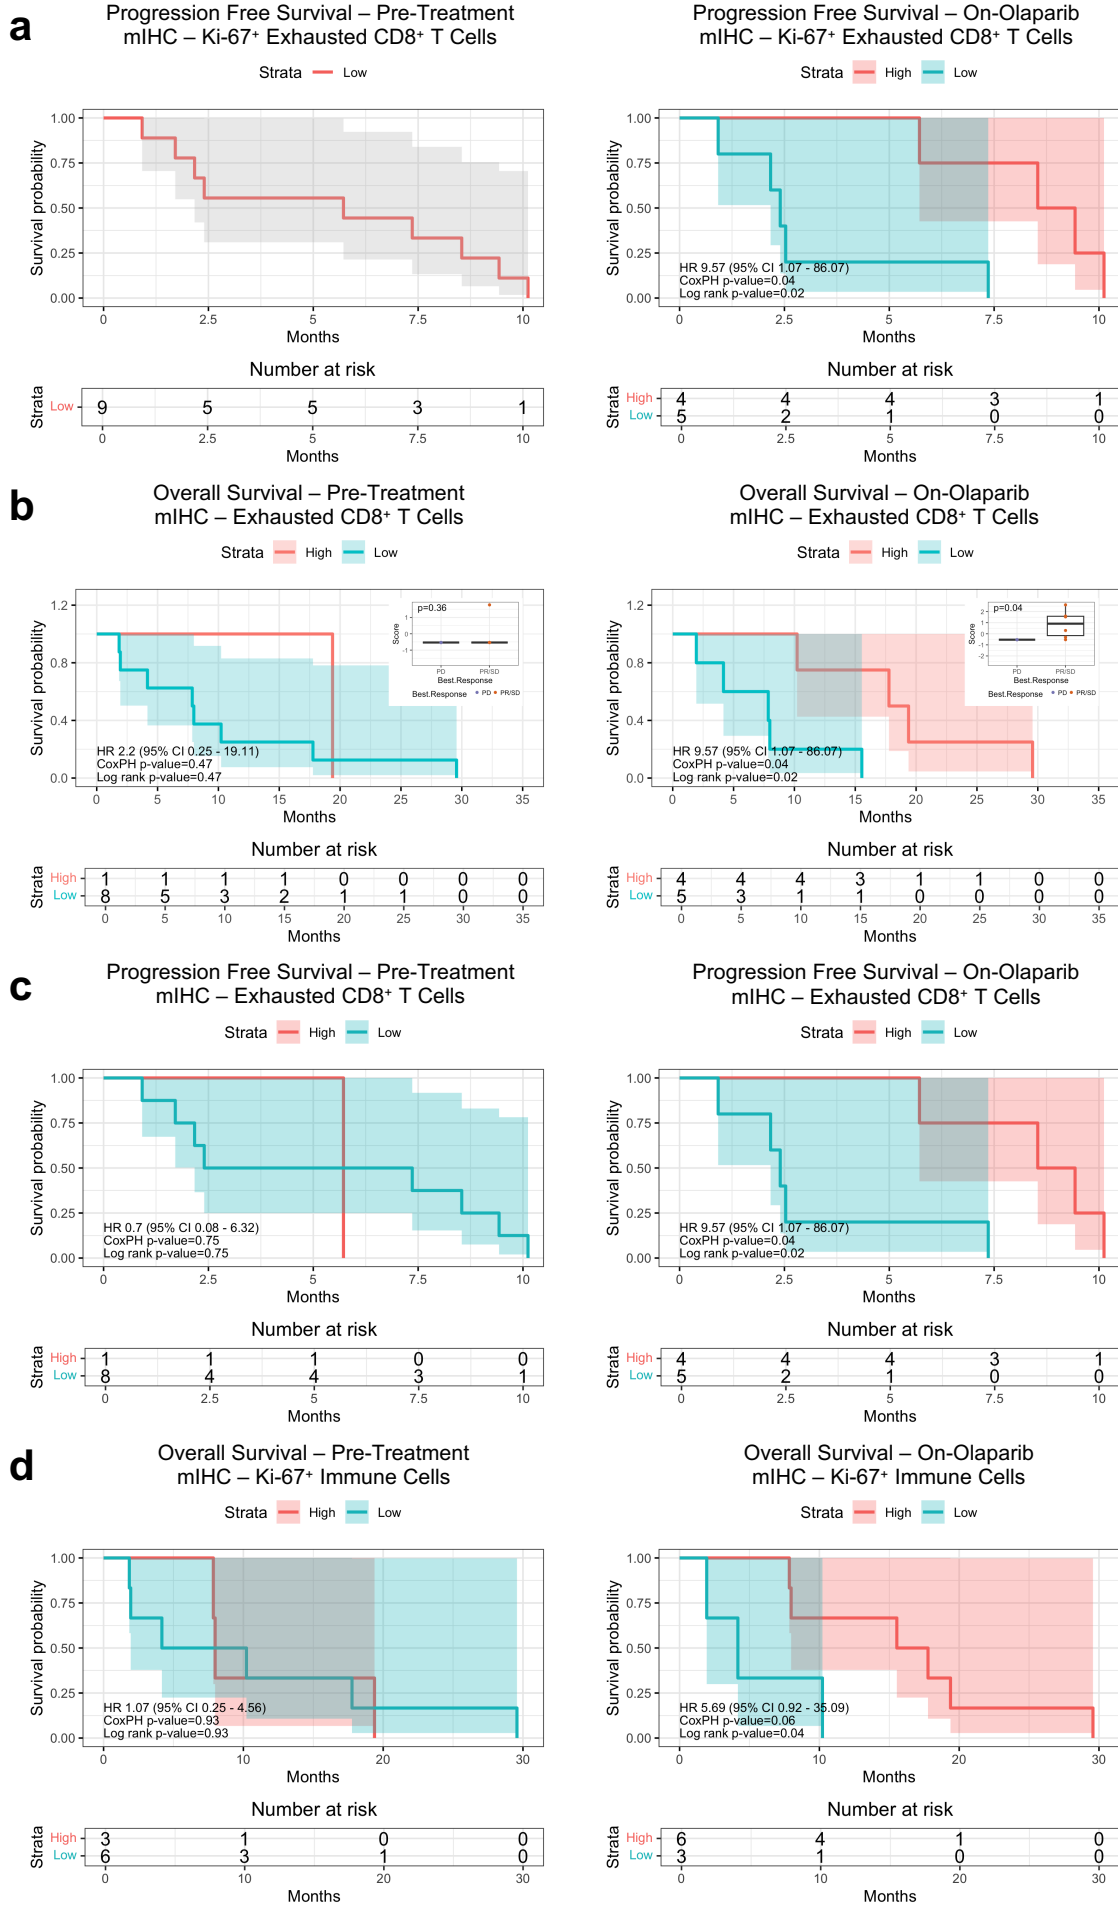

# Extended Data Figure 4

**e**

Overall Survival – Pre-Treatment  
mIHC – T Regulatory CD4<sup>+</sup> Cells

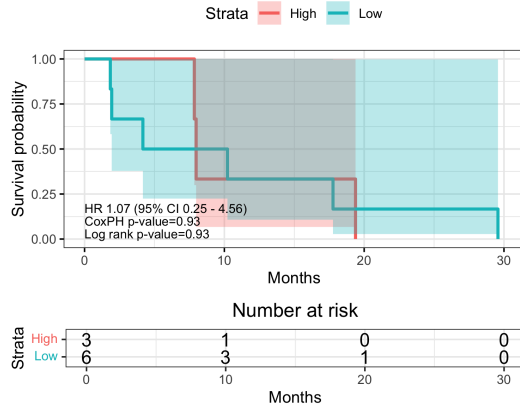

Overall Survival – On-Olaparib  
mIHC – T Regulatory CD4<sup>+</sup> Cells

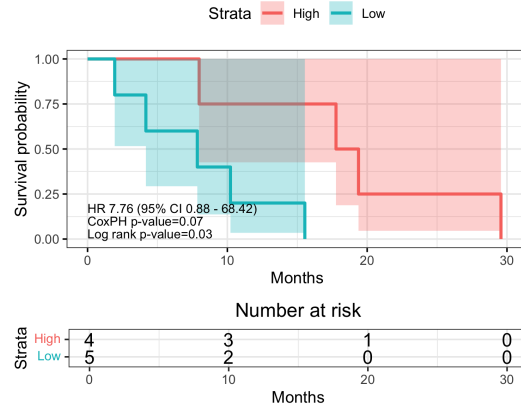

**f**

Overall Survival – Pre-Treatment  
mIHC – Macrophages

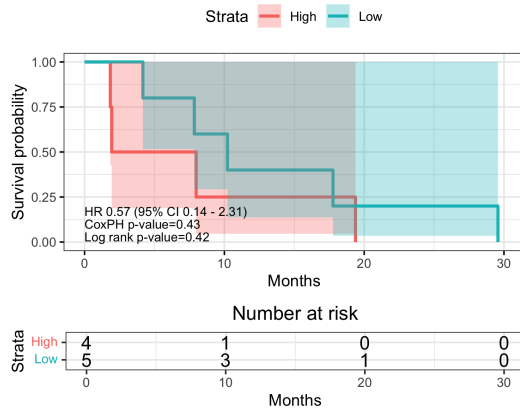

Overall Survival – On-Olaparib  
mIHC – Macrophages

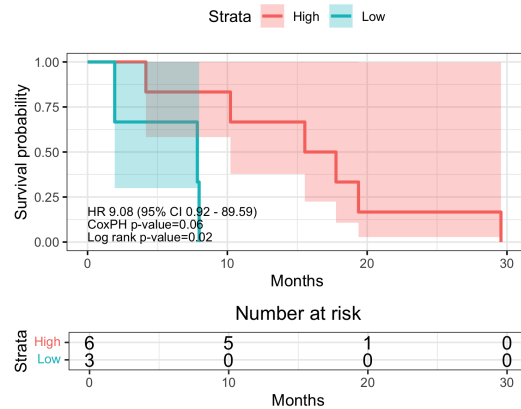

**g**

Progression Free Survival – Pre-Treatment  
mIHC – Macrophages

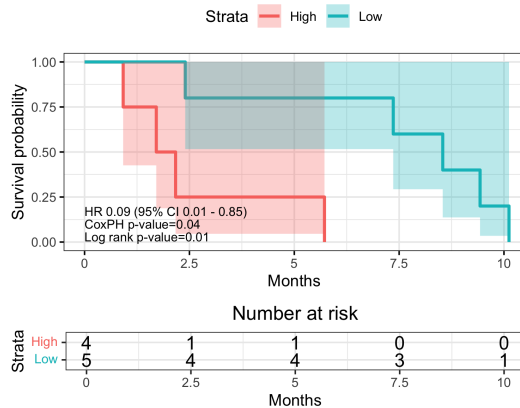

Progression Free Survival – On-Olaparib  
mIHC – Macrophages

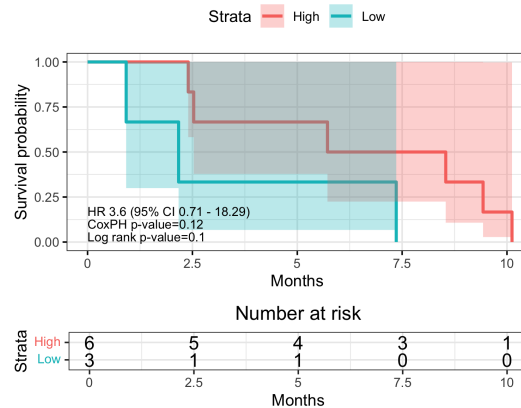

**h**

Progression Free Survival – Pre-Treatment  
mIHC – CD163<sup>+</sup> Macrophages

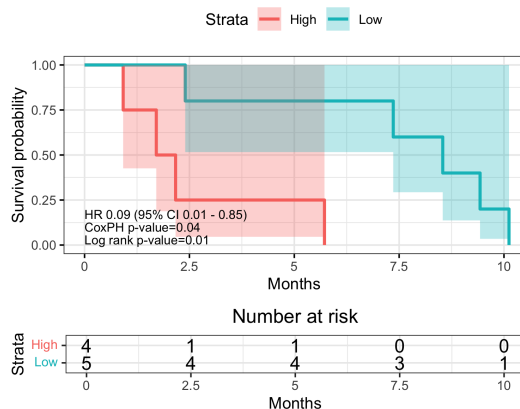

Progression Free Survival – On-Olaparib  
mIHC – CD163<sup>+</sup> Macrophages

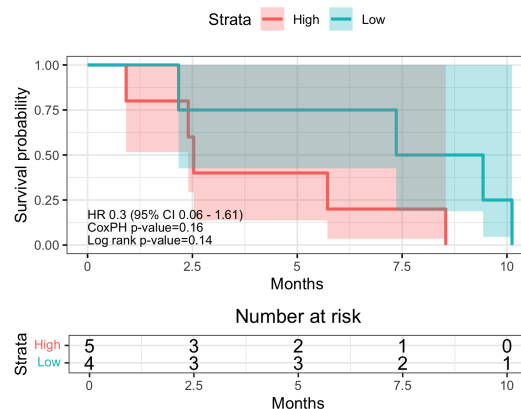



# Extended Data Figure 4

**i**

Overall Survival – Pre-Treatment  
mIHC – CD163- Macrophages

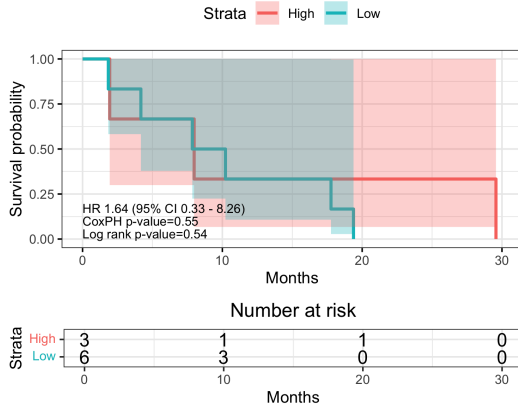

Overall Survival – On-Olaparib  
mIHC – CD163- Macrophages

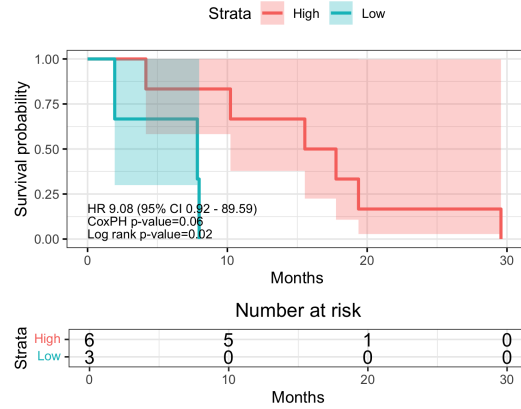

**j**

Progression Free Survival – Pre-Treatment  
mIHC – CD68+ CD163- Monocytes

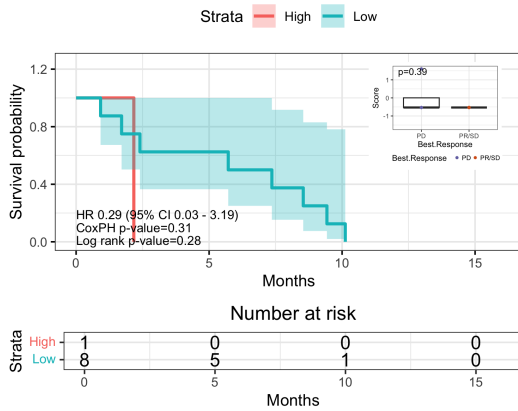

Progression Free Survival – On-Olaparib  
mIHC – CD68+ CD163- Monocytes

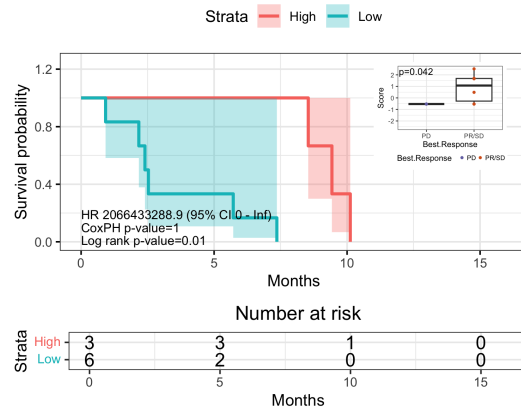

**k**

Overall Survival – Pre-Treatment  
DSP – CD68

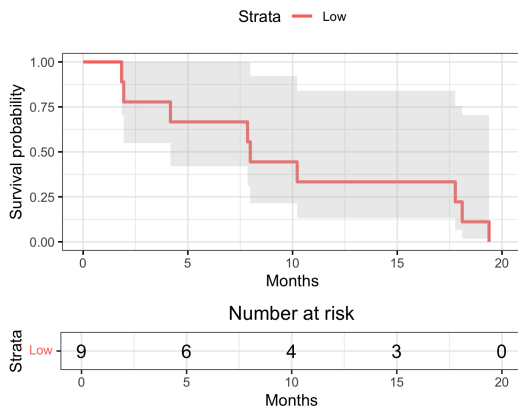

Overall Survival – On-Olaparib  
DSP – CD68

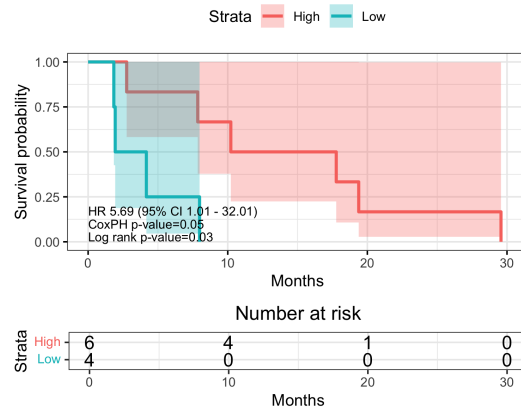

**l**

Progression Free Survival – Pre-Treatment  
DSP – CD68

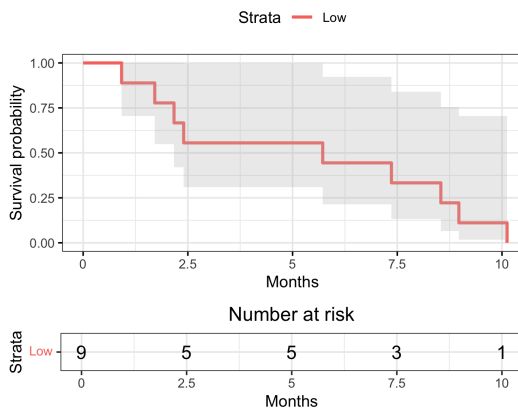

Progression Free Survival – On-Olaparib  
DSP – CD68

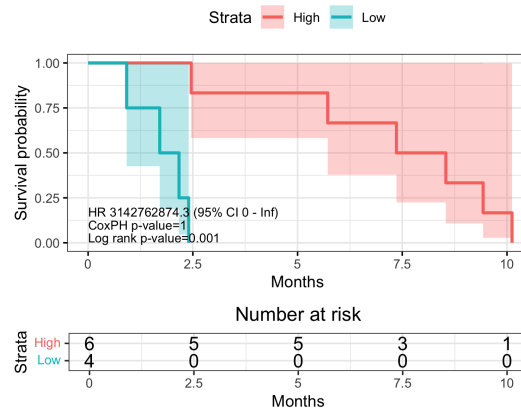

# Extended Data Figure 4

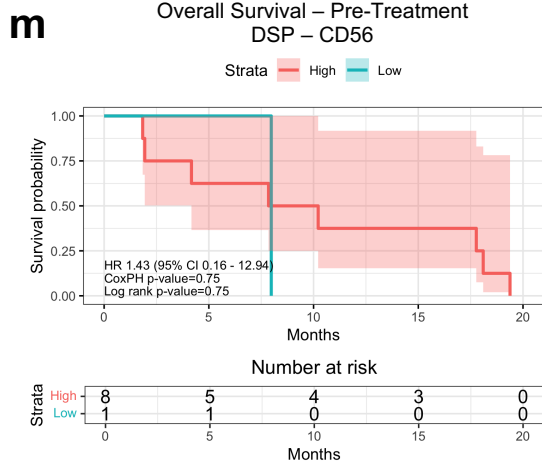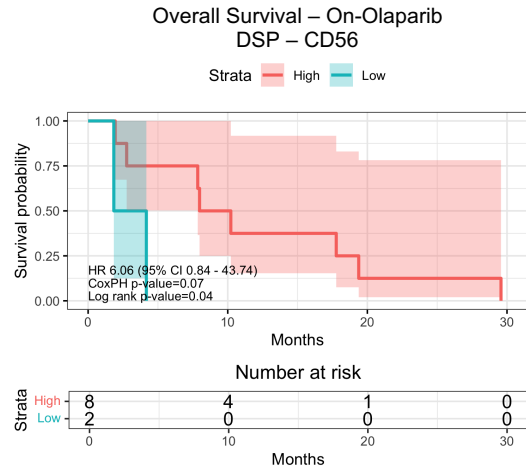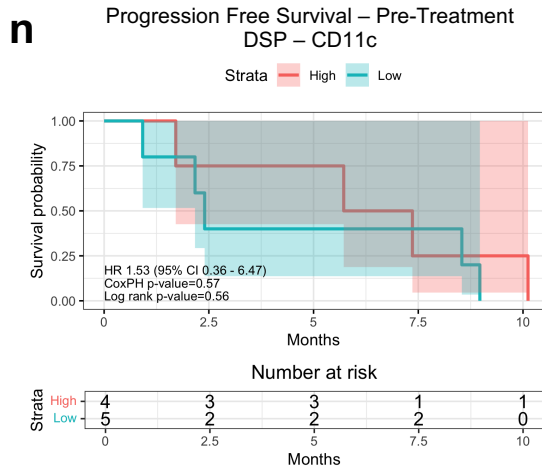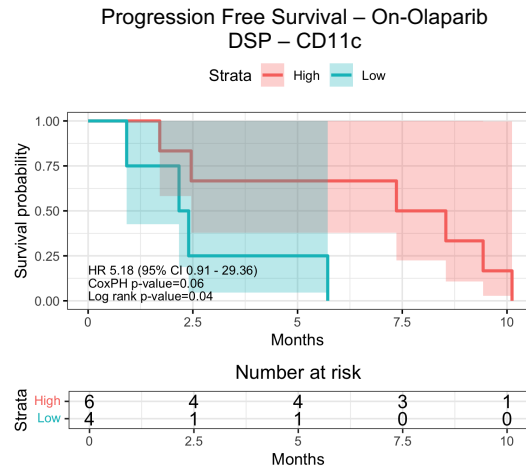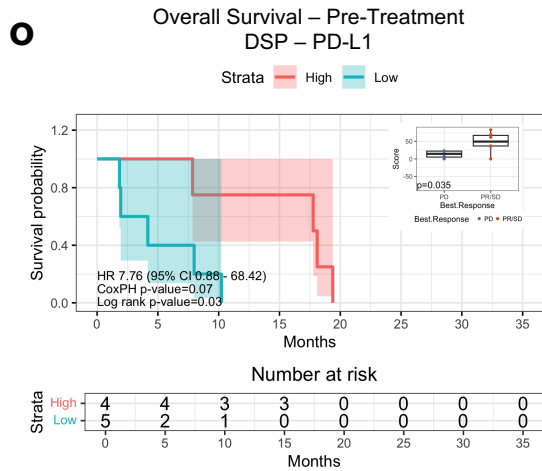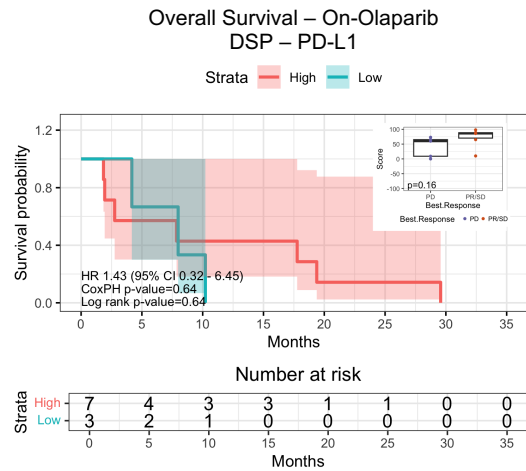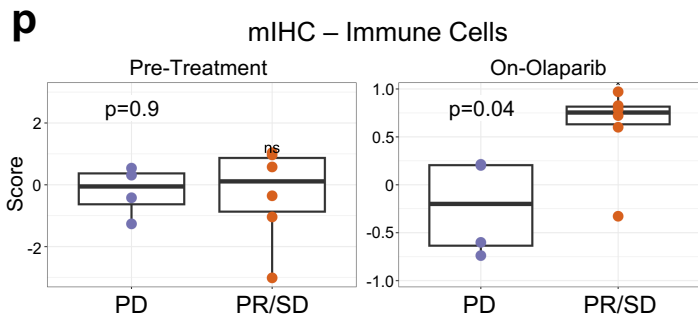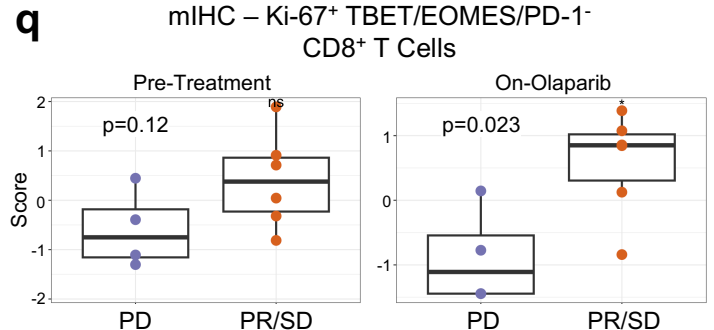

# Extended Data Figure 4

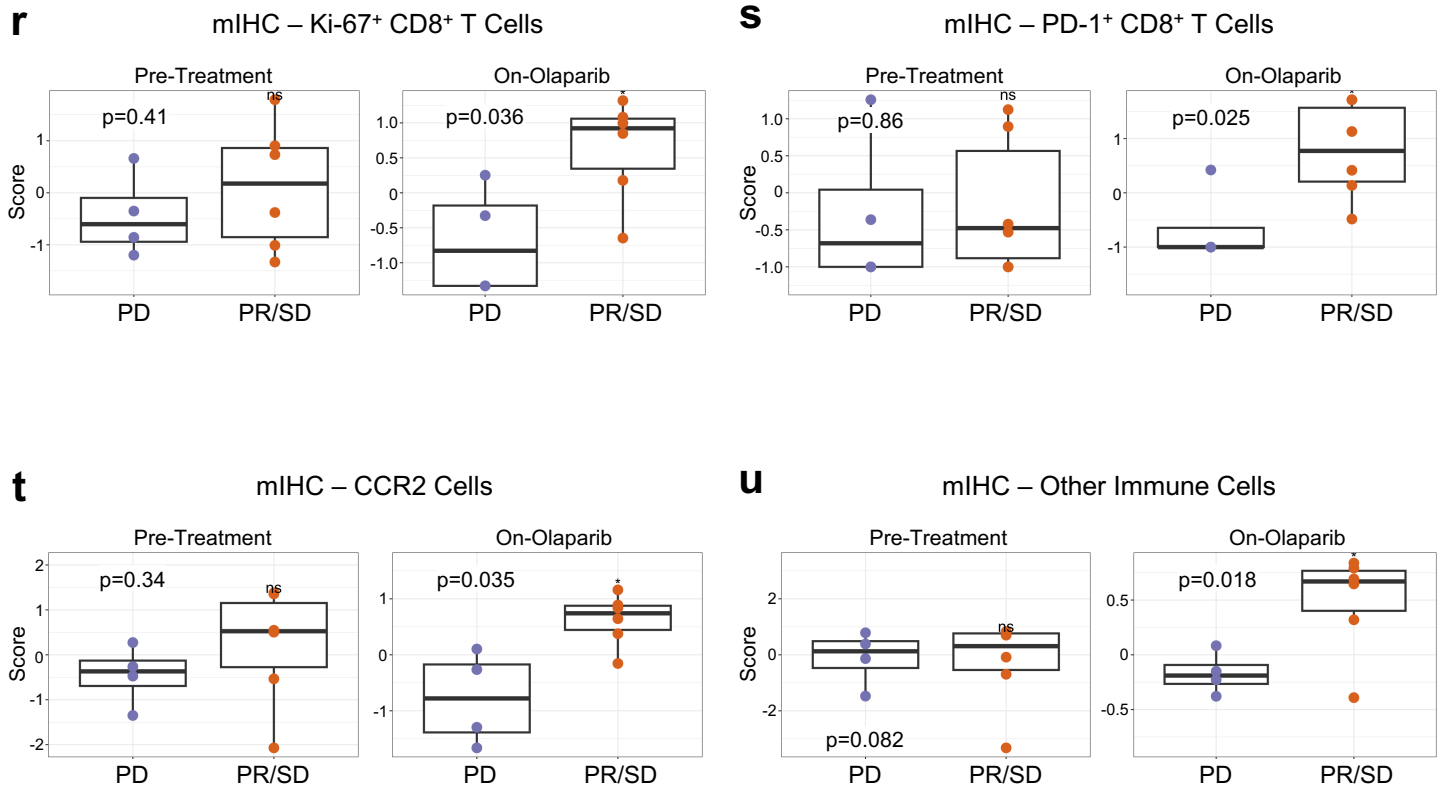

# Extended Data Figure 5

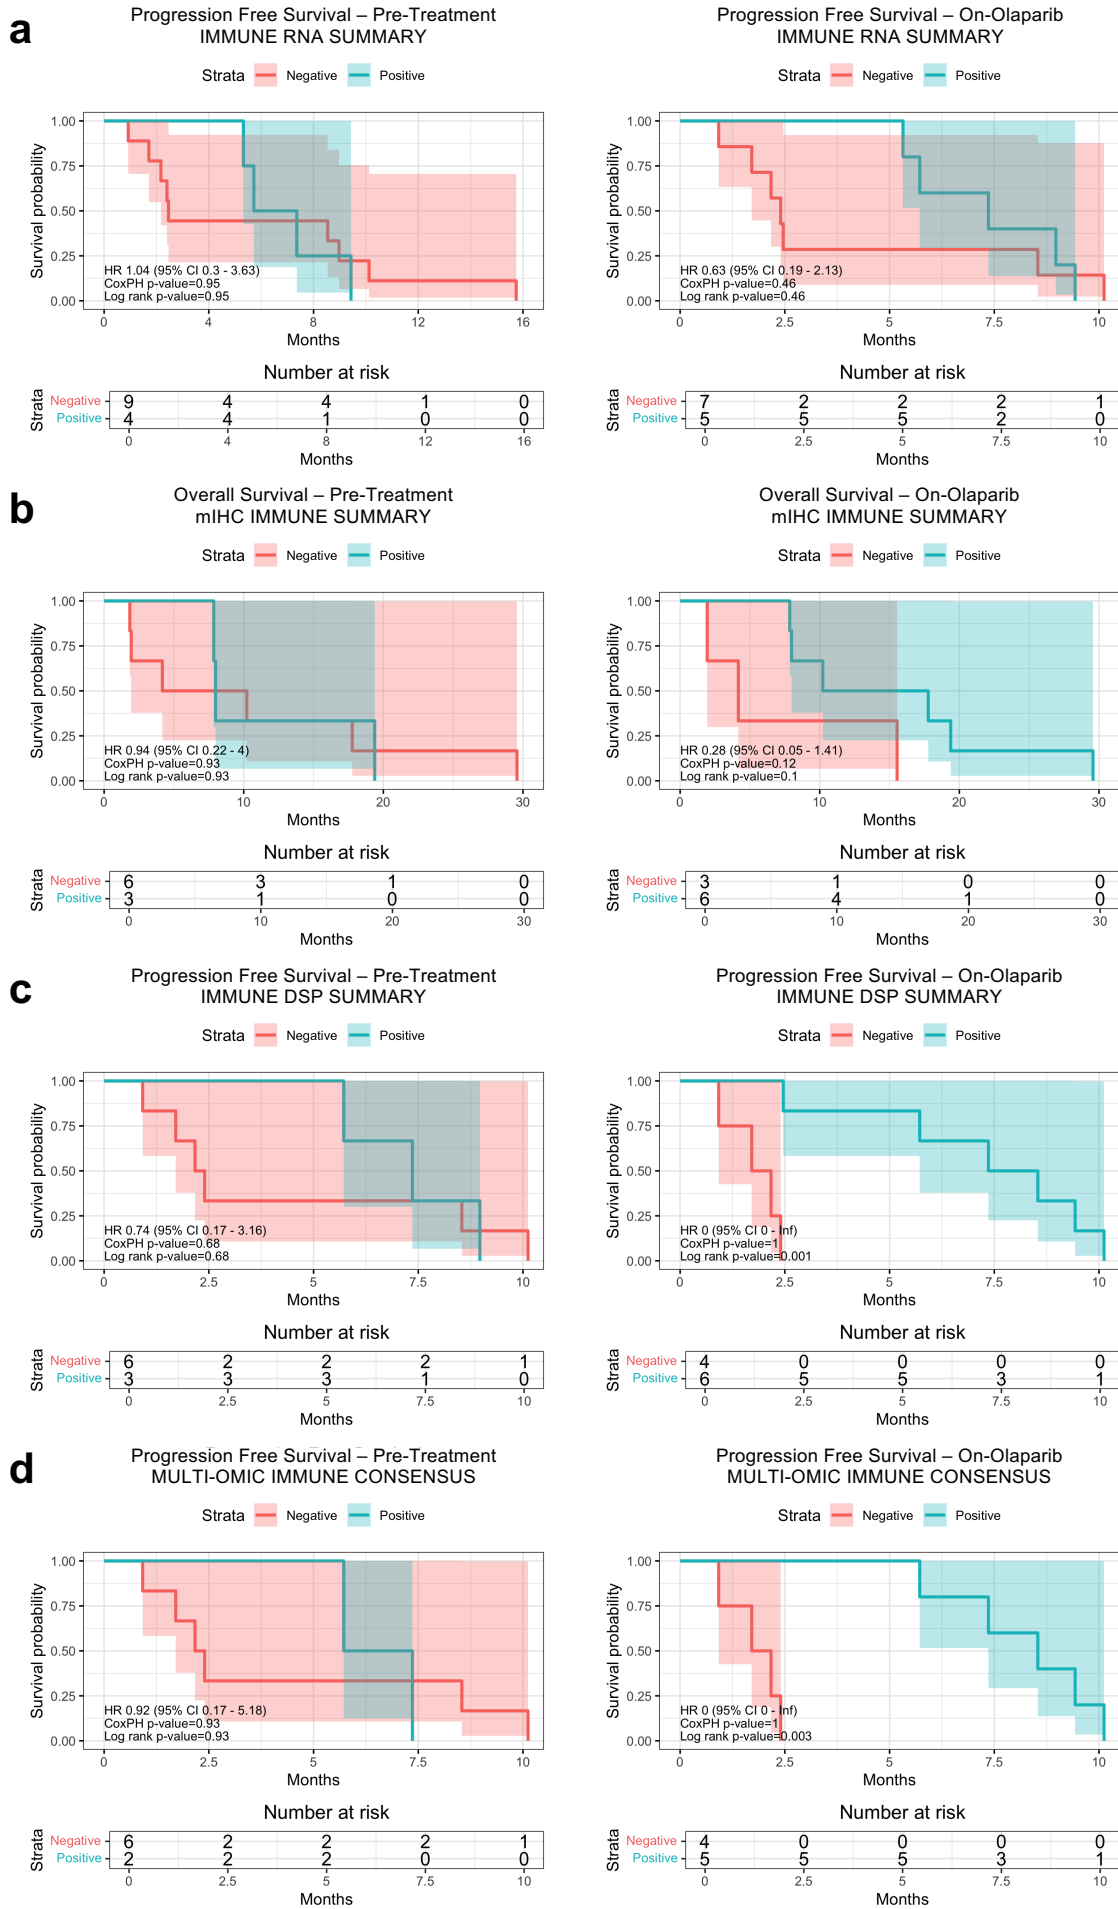

# Extended Data Figure 6

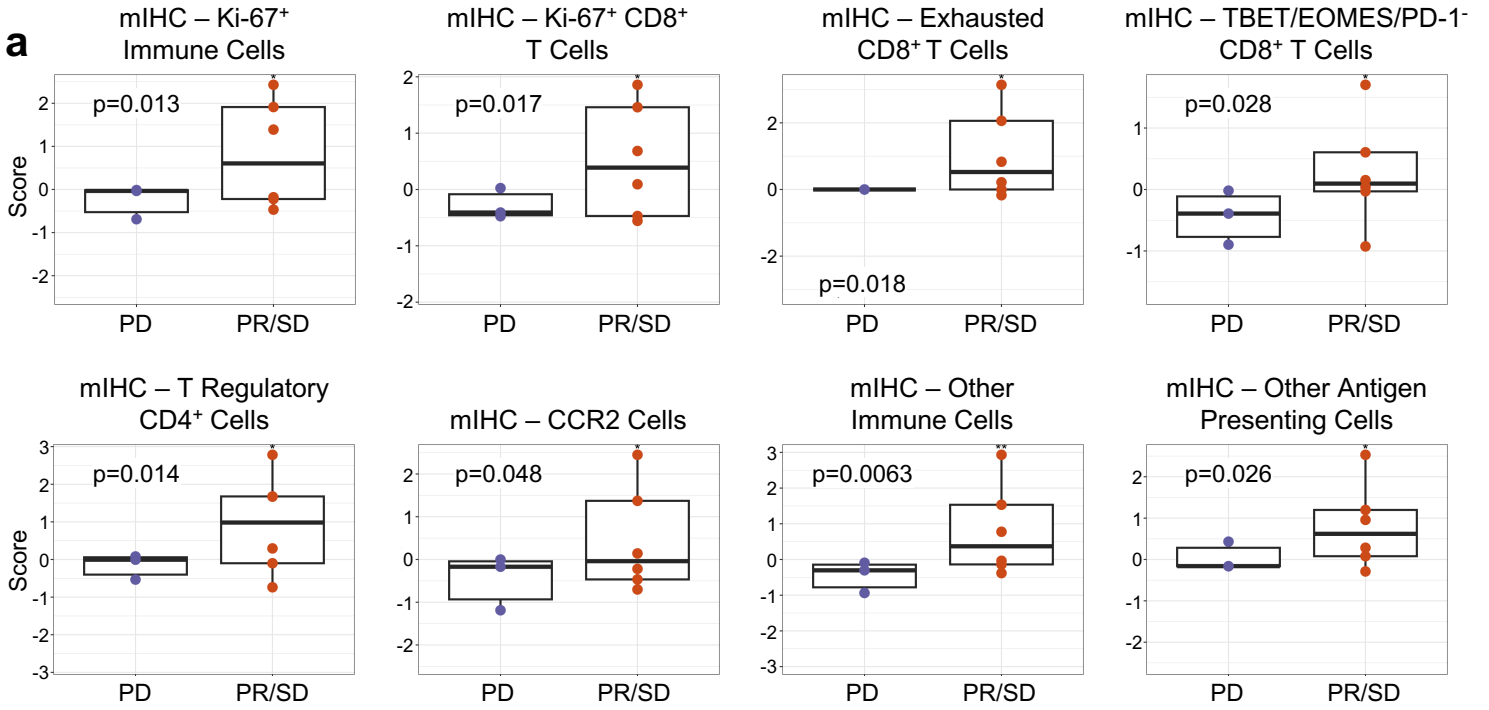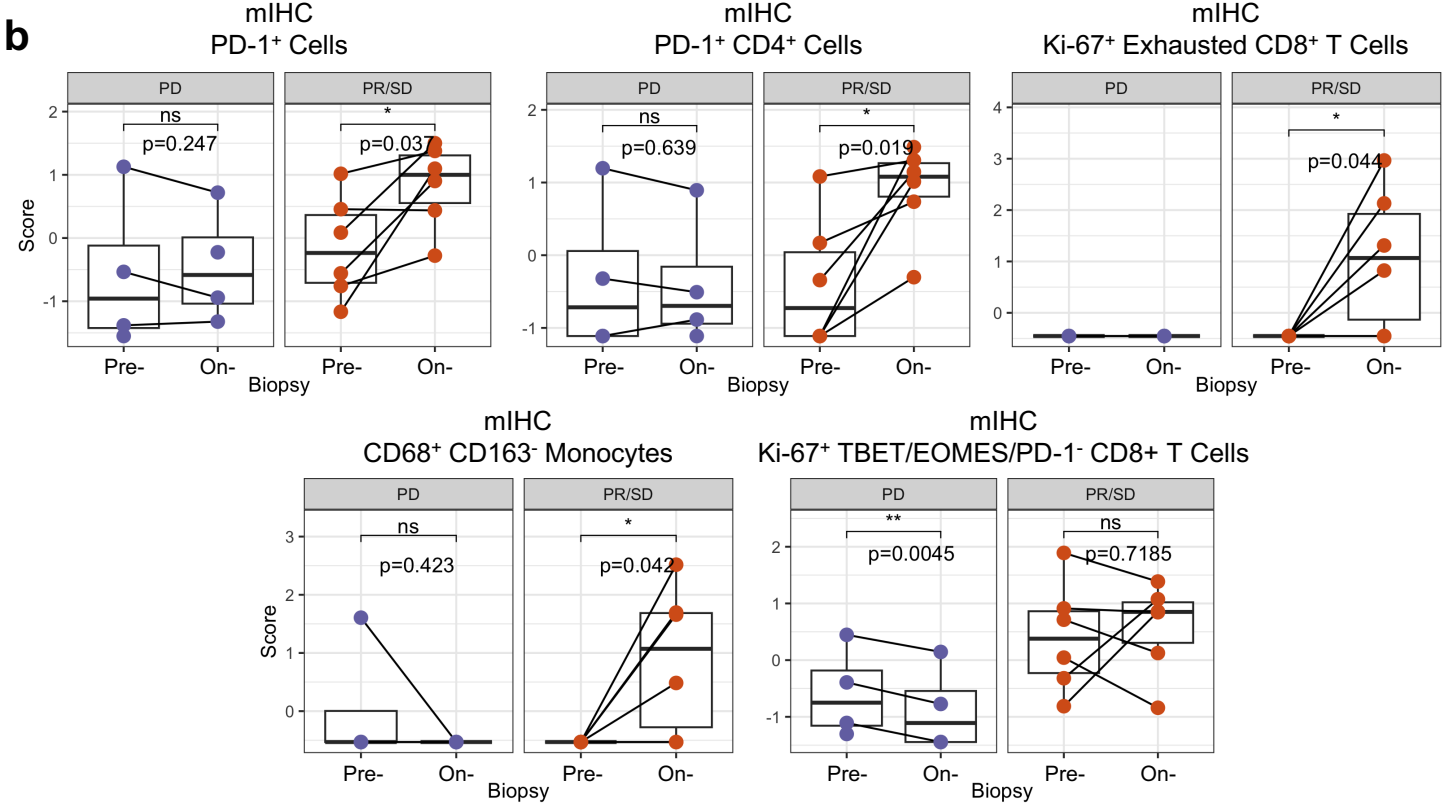

# Extended Data Figure 6

**C**

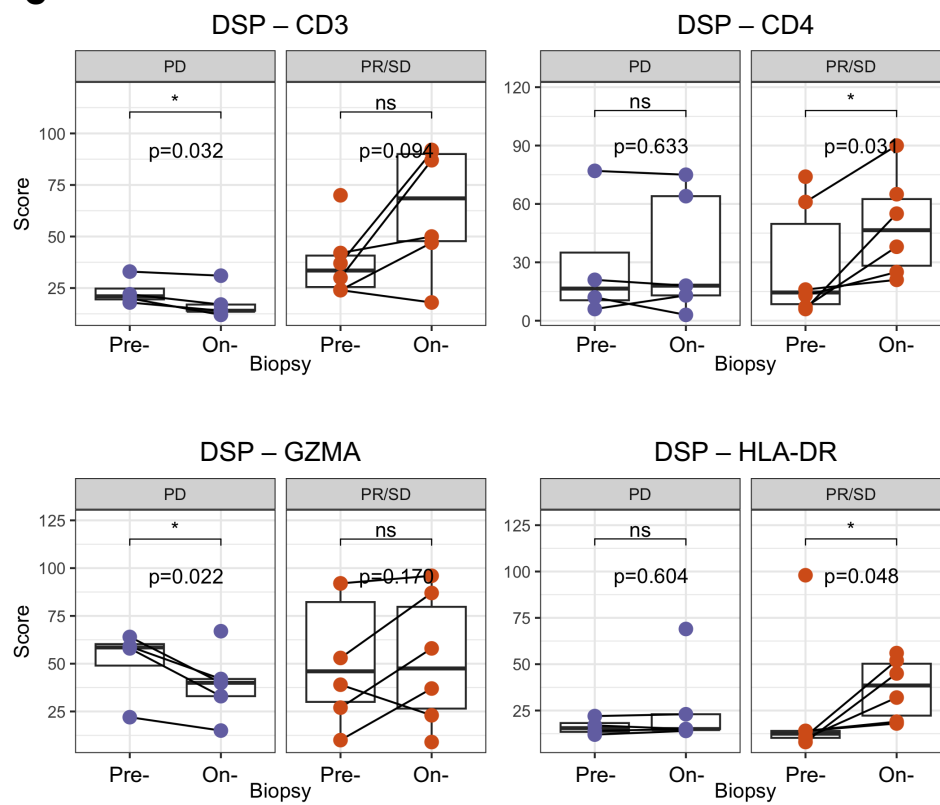

# Extended Data Figure 7

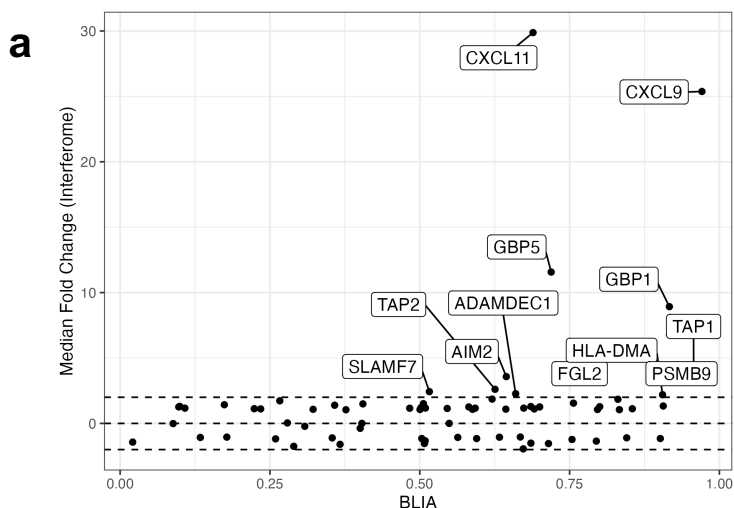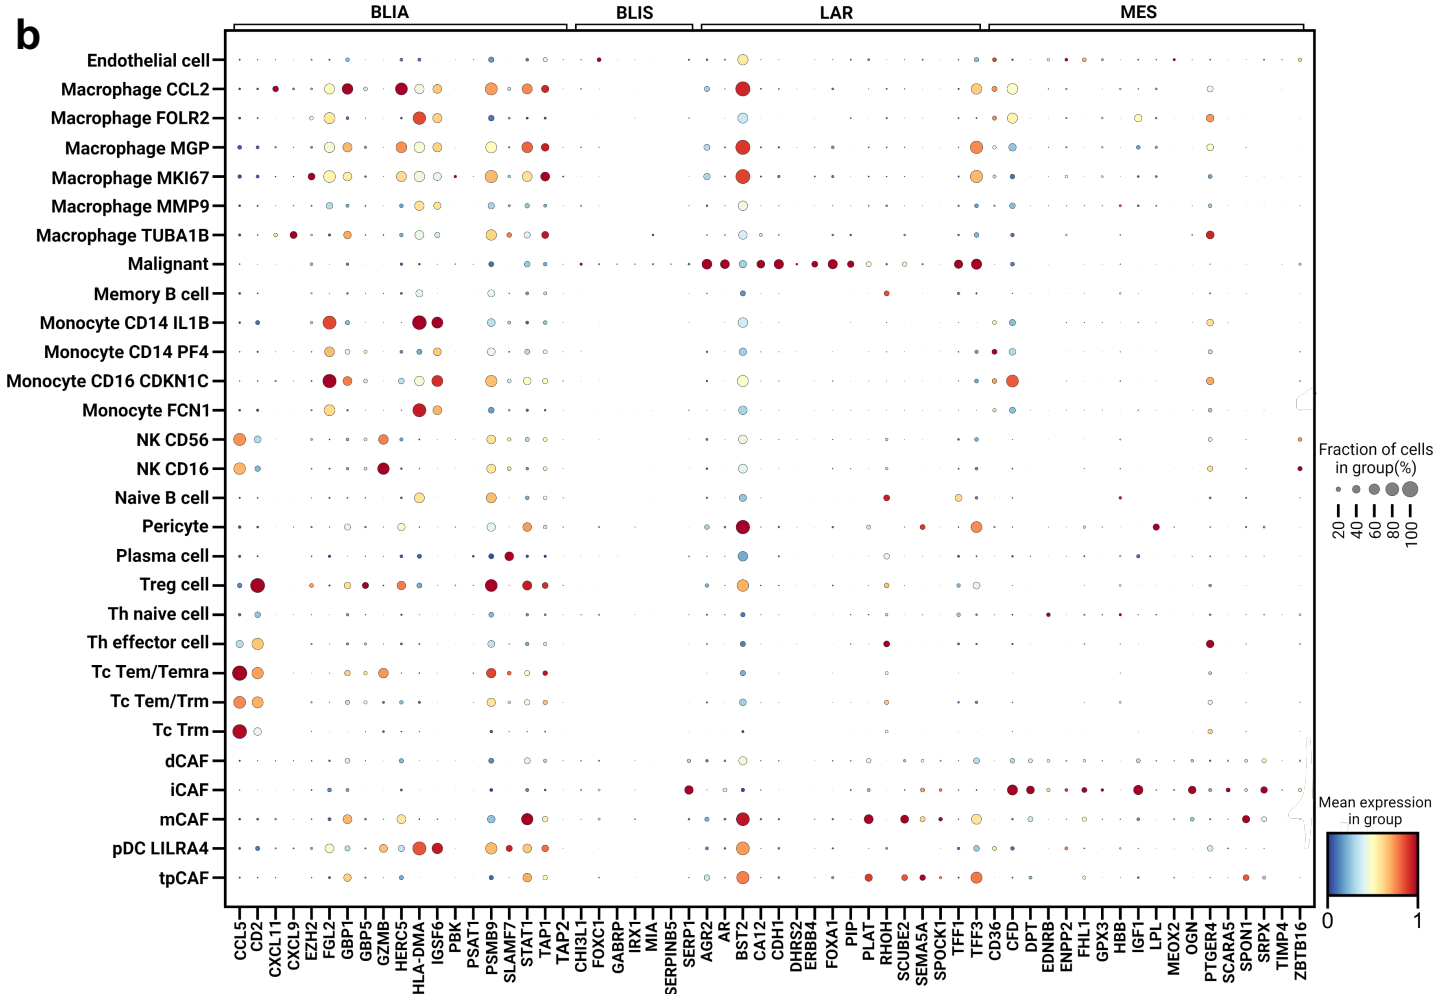

Supplement: Supplementary file [file media-1.pdf]
